# Supplementary material
Source: PubMed Central journal article supplement (PMC4365250)
Supplement: JCM.02930-14_zjm999094155so1.pdf [file JCM.02930-14_zjm999094155so1.pdf]

**Table S1.** Assembly data of *Salmonella* Manhattan isolates sequenced in this study

| Lab. N.   | Assembly Name | N. of Reads assembled | Avg. Coverage | N. of Contigs | N50    | Consensus Sequence (bp) |
|-----------|---------------|-----------------------|---------------|---------------|--------|-------------------------|
| 160969_3  | <b>SM1</b>    | 1710982               | 68.74         | 156           | 141280 | 4719245                 |
| 160969_5  | <b>SM2</b>    | 2535189               | 93.97         | 61            | 276557 | 4691989                 |
| 160969_6  | <b>SM3</b>    | 2521184               | 95.83         | 47            | 550676 | 4687862                 |
| 165051_2  | <b>SM4</b>    | 1146836               | 46.38         | 141           | 122404 | 4721098                 |
| 165051_3  | <b>SM5</b>    | 2819494               | 104.36        | 54            | 432406 | 4695440                 |
| 165051_5  | <b>SM6</b>    | 830776                | 32.23         | 151           | 76537  | 4716655                 |
| 165051_7  | <b>SM7</b>    | 2513260               | 87.78         | 73            | 426283 | 4700219                 |
| 111113    | <b>SM8</b>    | 7263890               | 237.97        | 52            | 653456 | 4696541                 |
| 165051_11 | <b>SM9</b>    | 705833                | 22.13         | 377           | 22555  | 4690025                 |
| 165051_12 | <b>SM10</b>   | 4464240               | 152.62        | 51            | 447907 | 4695242                 |
| 180073_1  | <b>SM11</b>   | 2139784               | 71.96         | 70            | 220086 | 4695118                 |
| 180073_2  | <b>SM12</b>   | 6155851               | 228.73        | 65            | 502439 | 4701365                 |
| 180073_3  | <b>SM13</b>   | 550660                | 19.19         | 532           | 15189  | 4691653                 |
| 180073_4  | <b>SM14</b>   | 635849                | 20.68         | 547           | 17783  | 4668733                 |
| 180073_6  | <b>SM15</b>   | 1718689               | 67.07         | 119           | 206519 | 4707922                 |
| 226963    | <b>SM17</b>   | 1115555               | 45.53         | 135           | 94514  | 4678408                 |
| 226972    | <b>SM19</b>   | 3647977               | 136.8         | 132           | 612314 | 4692088                 |
| 226979    | <b>SM21</b>   | 2113563               | 81.76         | 161           | 186243 | 4701558                 |
| 226985    | <b>SM23</b>   | 743857                | 24.78         | 370           | 26335  | 4647025                 |
| 226987    | <b>SM24</b>   | 8101538               | 245.95        | 101           | 401695 | 4680260                 |
| 226998    | <b>SM27</b>   | 1083529               | 43.12         | 1342          | 28467  | 4977060                 |
| 227009    | <b>SM29</b>   | 2745872               | 115.51        | 124           | 239046 | 4725171                 |
| 227021    | <b>SM32</b>   | 1534324               | 55.28         | 135           | 109153 | 4703213                 |
| 227033    | <b>SM35</b>   | 4401622               | 170.21        | 73            | 398381 | 4708271                 |
| 227039    | <b>SM36</b>   | 5195701               | 198.34        | 60            | 441398 | 4670782                 |
| 227052    | <b>SM38</b>   | 463509                | 18.26         | 560           | 16977  | 4659968                 |

|          |             |         |       |      |        |         |
|----------|-------------|---------|-------|------|--------|---------|
| 250920   | <b>SM42</b> | 690442  | 24.49 | 353  | 27141  | 4693959 |
| 188806   | <b>SM48</b> | 2189455 | 84.38 | 247  | 54375  | 4705944 |
| 188795   | <b>SM49</b> | 1110088 | 38.44 | 1162 | 11195  | 4727662 |
| 188781   | <b>SM50</b> | 1887637 | 61.78 | 320  | 51793  | 4764060 |
| 188801   | <b>SM52</b> | 1047164 | 31.64 | 166  | 57534  | 4690524 |
| 216630/1 | <b>SM53</b> | 599806  | 21.47 | 464  | 20152  | 4696208 |
| 216630/2 | <b>SM54</b> | 7964395 | 244.2 | 67   | 472508 | 4700846 |

---

**Figure S1.** Phylogenetic reconstruction of the 33 *Salmonella* Manhattan isolates based on core (panel A), synonymous (panel B) and non-synonymous (panel C) SNPs datasets, analyzed with Maximum Likelihood method. Bootstrap values are indicated in each principal node of the trees. The scale bar units are nucleotide substitutions per site. # WGS analyses clustered isolate SM36 (pulsotype SXB\_PR.0752) together with the isolates of the outbreak pulsotype (SXB\_BS0003).

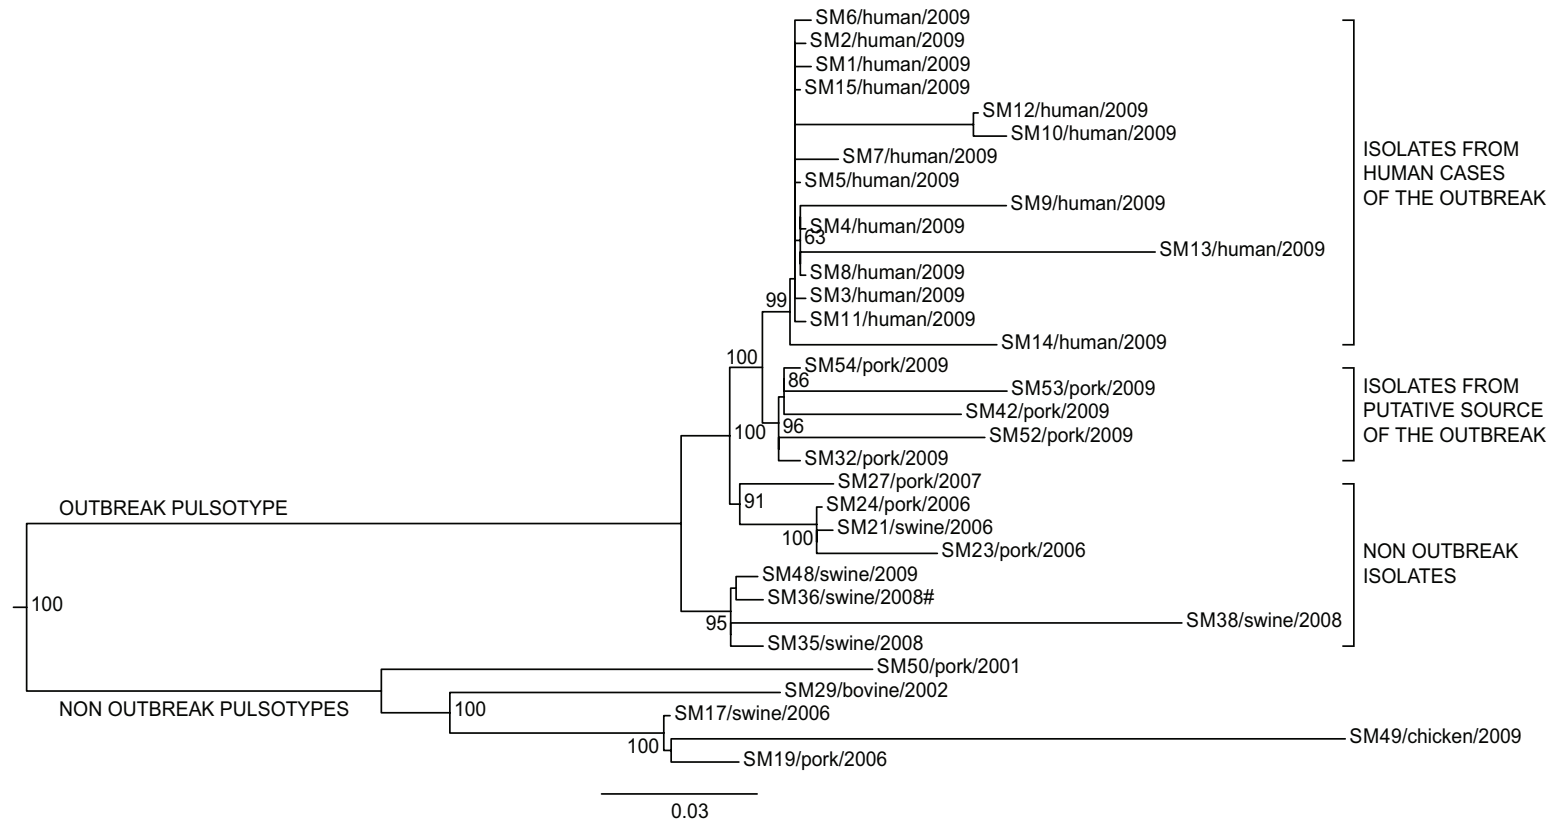

Panel A.

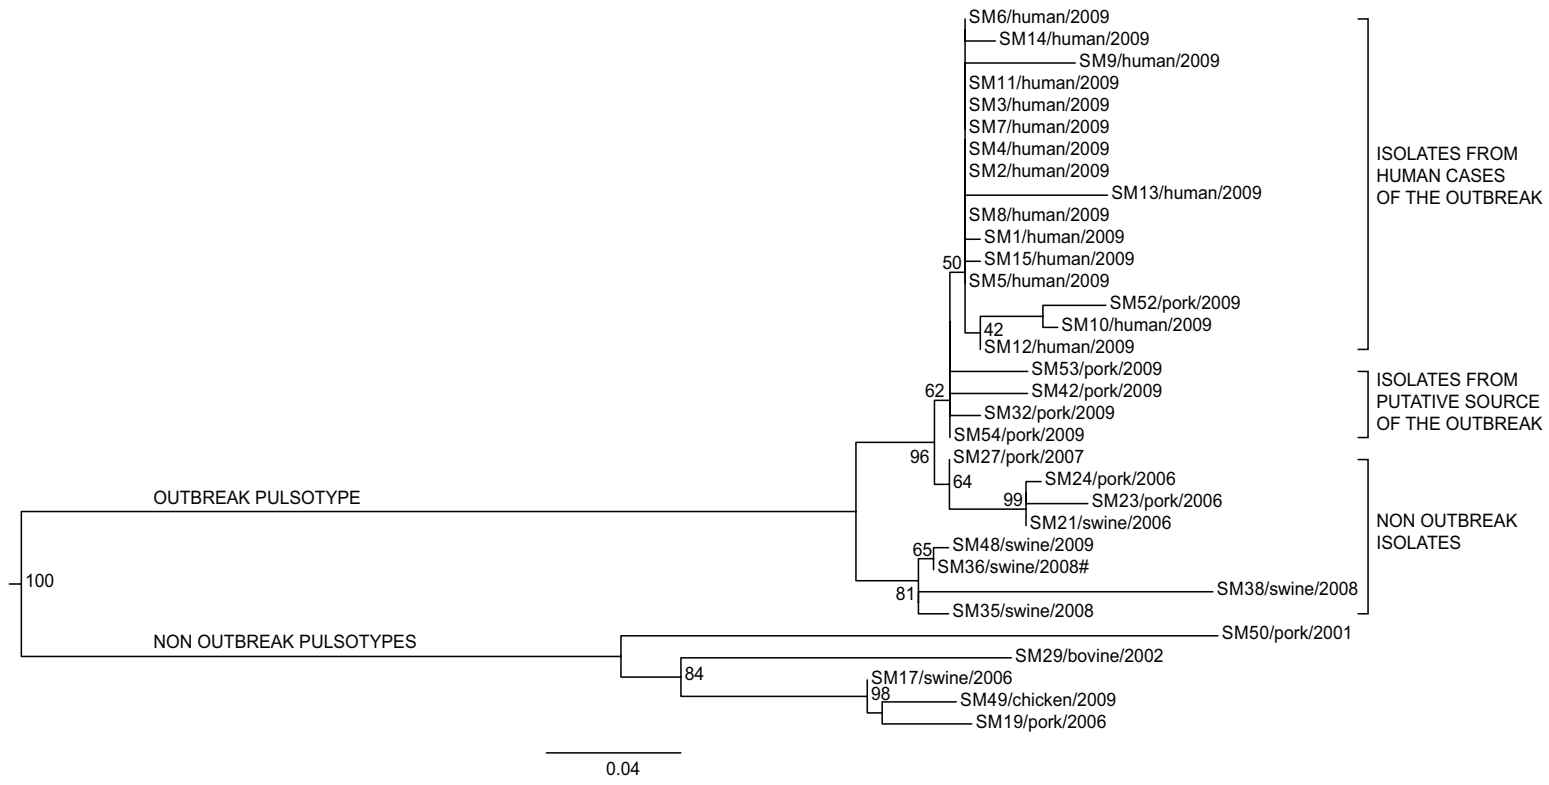

Panel B.

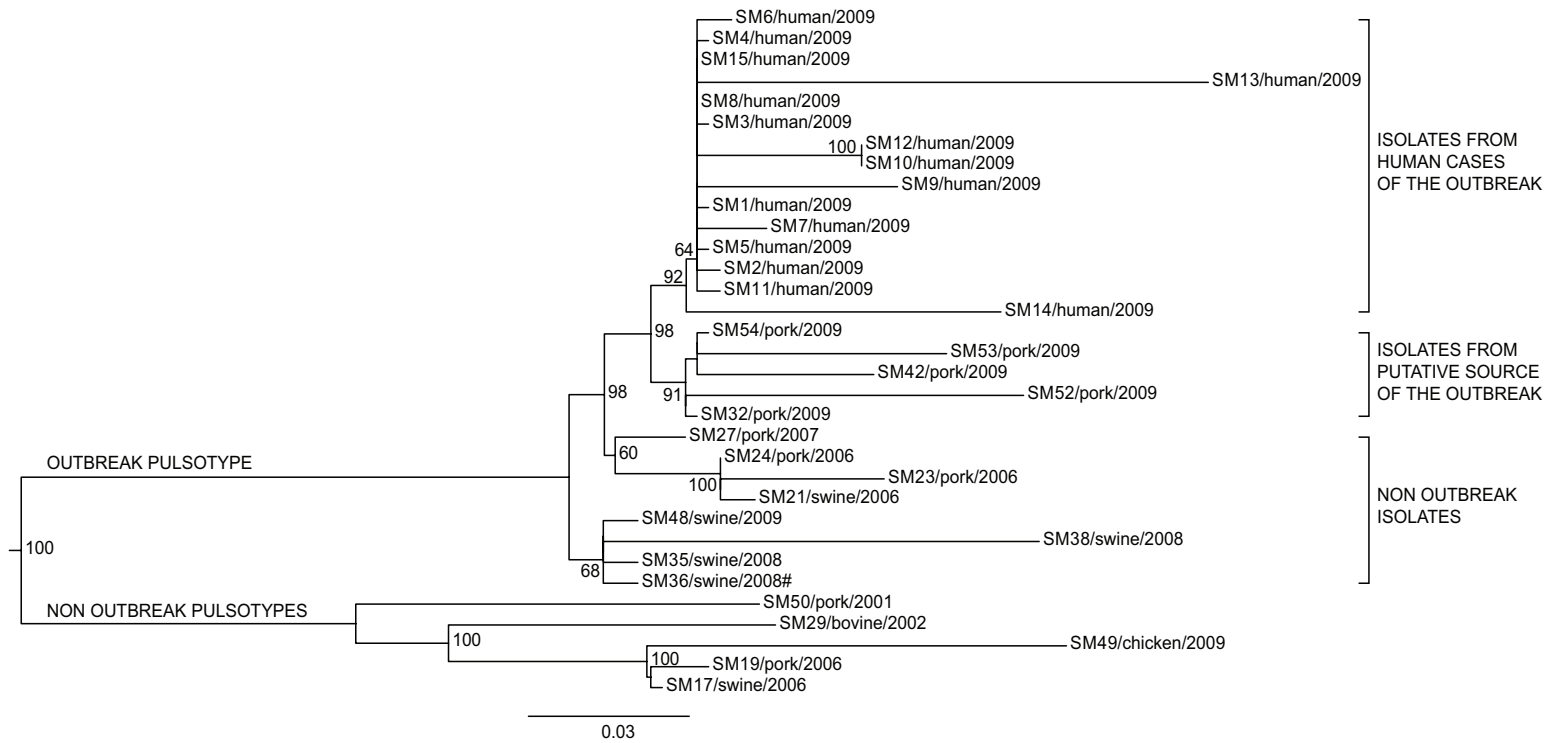

Panel C.

**Figure S2:** Phylogenetic reconstruction of the 33 *Salmonella* Manhattan isolates analyzed with the Maximum Likelihood algorithm, based on SNPs in first (panel A), second (panel B), third (Panel C) and first+second codon positions (Panel D) datasets. Bootstrap values are indicated in each principal node of the trees. The scale bar units are nucleotide substitutions per site. # WGS analyses clustered isolate SM36 (pulsotype SXB\_PR.0752) together with the isolates of the outbreak pulsotype (SXB\_BS0003).

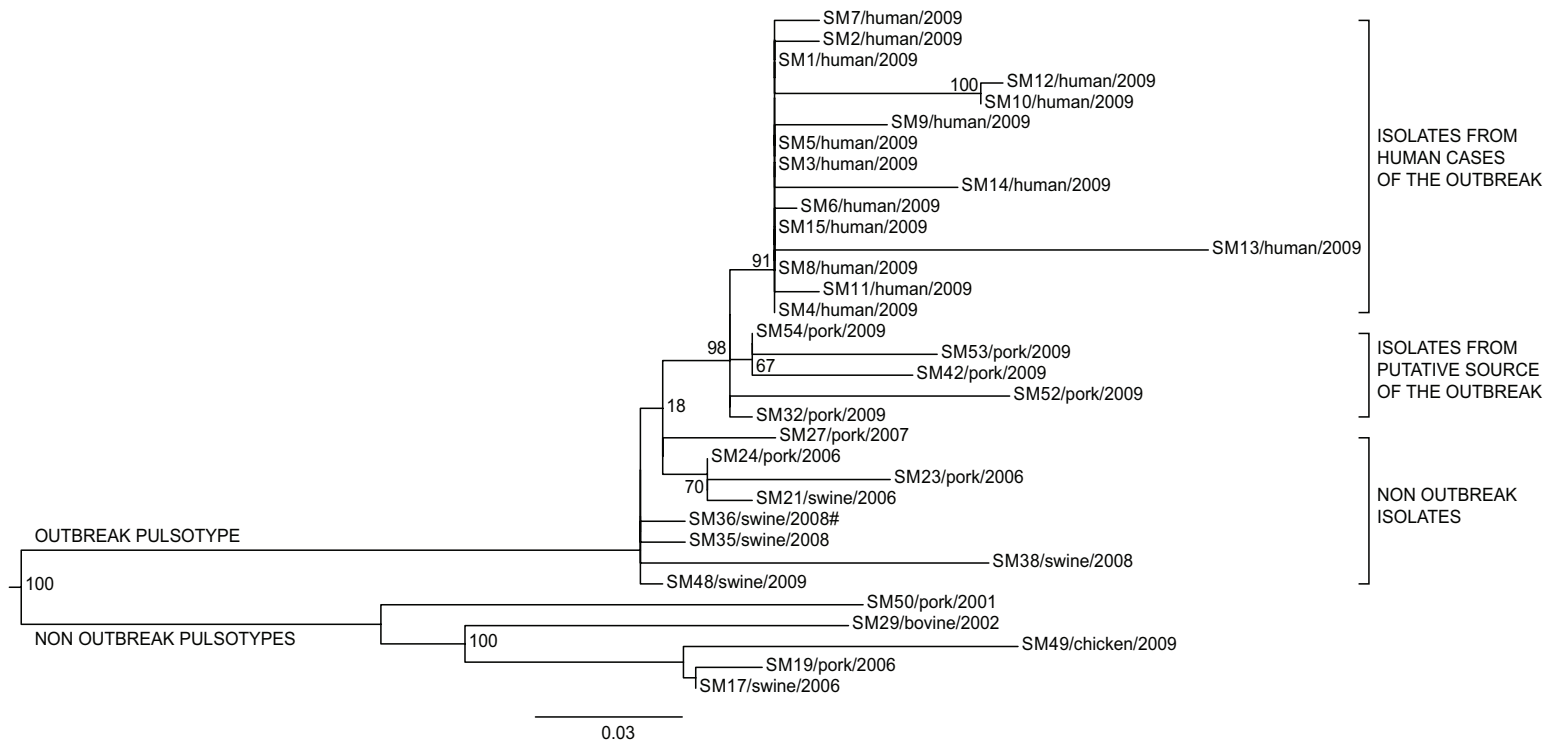

Panel A.

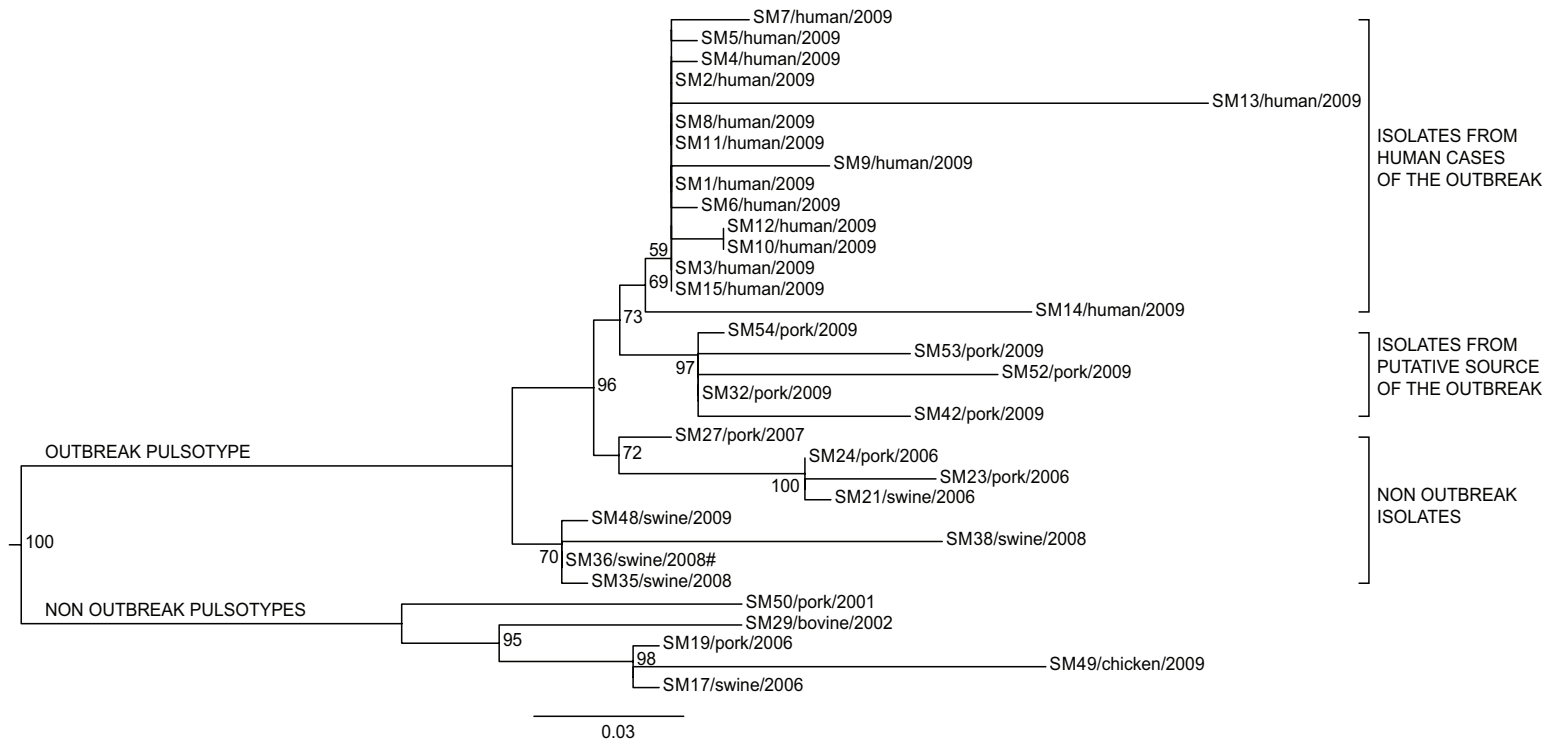

Panel B.

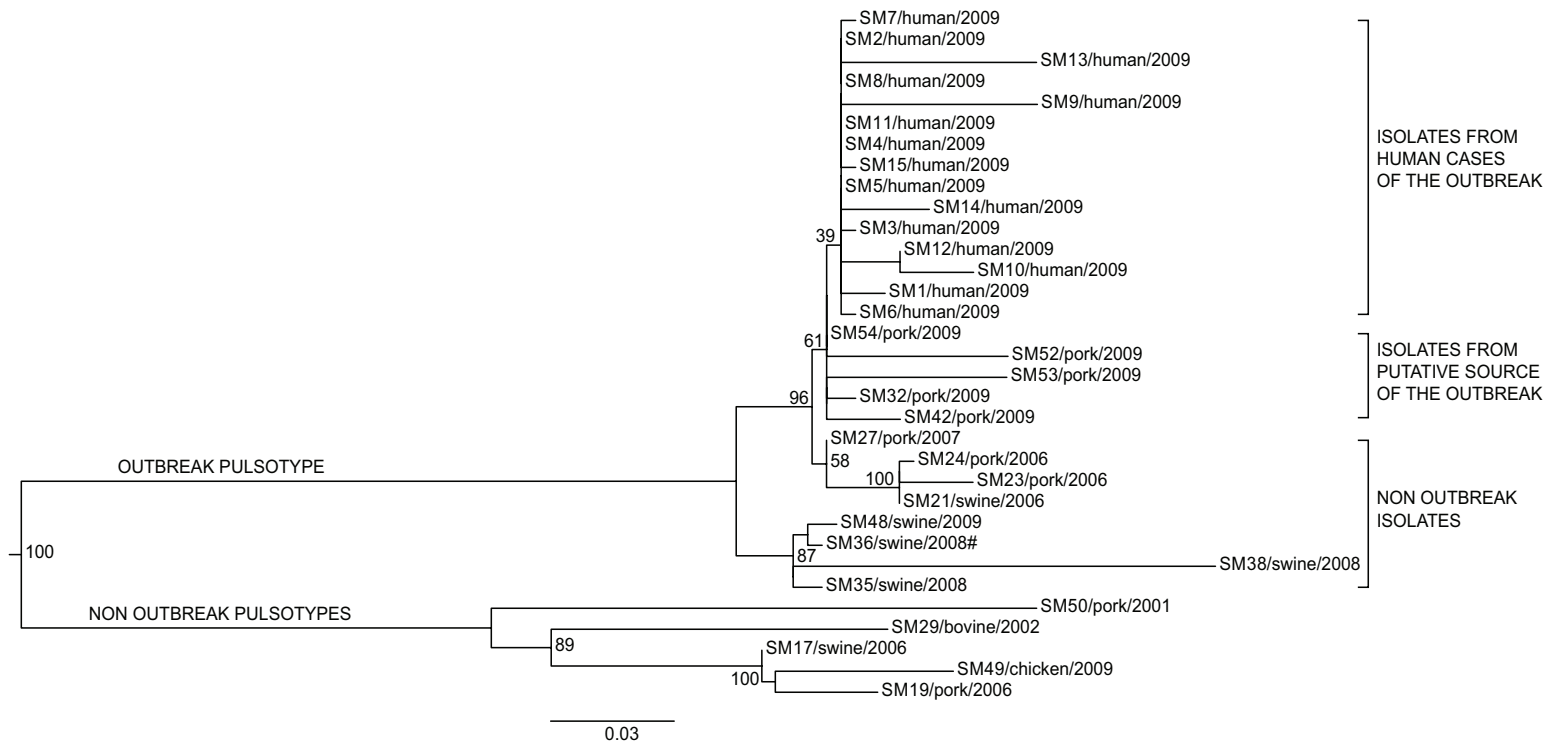

Panel C.



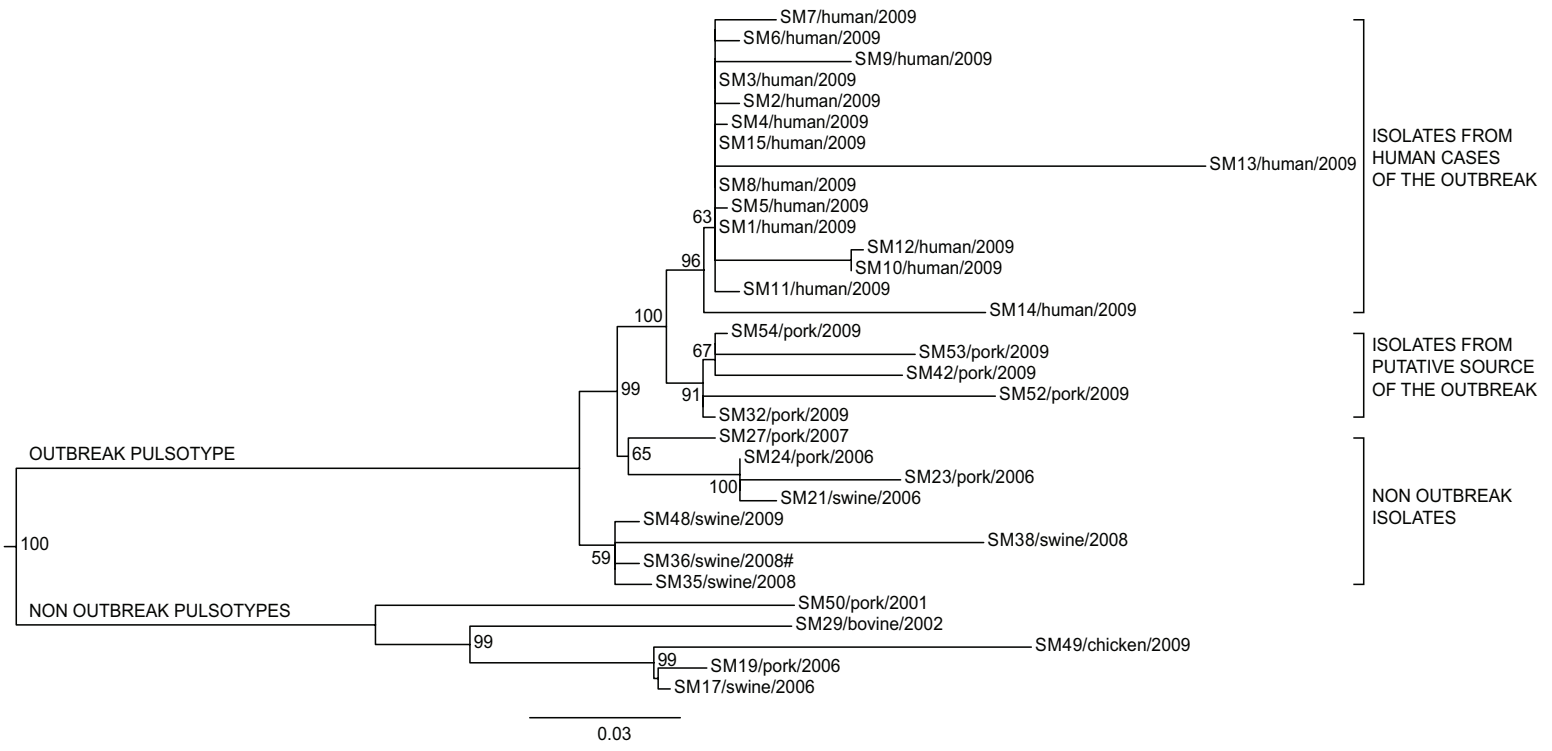

Panel D.
